# Supplementary material for: High leukocyte mtDNA content contributes to poor prognosis through ROS-mediated immunosuppression in hepatocellular carcinoma patients
Source: PubMed Central journal article supplement (PMC5008404; doi:10.18632/oncotarget.8071), 2016-03-14
Supplement: oncotarget-07-22834-s001.pdf [file oncotarget-07-22834-s001.pdf]

## SUPPLEMENTARY METHODS

### Detection of mtDNA content by real-time quantitative PCR

Relative leukocyte mtDNA content was measured by a two-step real-time quantitative PCR-based method as previously described [1]. Briefly, two pairs of primers were used in the two steps of relative quantification for mtDNA content. The primer sequences for the mitochondrial ND1 gene were as follows: forward primer (ND1-F), 5'-CCCTAAAACCCgCCACATCT-3'; reverse primer (ND1-R), 5'-GAGCGATGGTGAGAGCTAAGGT-3'. The single-copy nuclear gene human globulin (HGB) was used as a housekeeping gene control and the primer pair was as follows: forward primer (HGB-1), 5'-GTGCACCTGACTCCTGAGGAGA-3'; reverse primer (HGB-2), 5'-CCTTGATACCAACCTGCCAG-3'. In the first step, the ratio of mtDNA copy number to HGB copy number was determined for each sample from standard curves. In the second step, the mtDNA/HGB ratio for each sample was normalized to a calibrator DNA to standardize between different runs and the normalized mtDNA/HGB ratio was defined as the measurement of relative mtDNA copy number in this study. The calibrator DNA is a genomic DNA sample from a healthy control subject. It was measured in each run and used to standardize different real-time quantitative PCR runs. The value of this only scaling factor varied from 0.89 to 1.17 across different runs. The intra-assay or interassay variations were evaluated by assaying one sample in eight replicates or in three different runs, respectively.

The PCR reaction (20  $\mu$ L) consisted of 1  $\times$  SYBR green mastermix (TaKaRa, Dalian, China), 10 nM ND1-R (or HGB-1) primer, 10 nM ND1-F (or HGB-2) primer, and 8 ng of genomic DNA. The thermal cycling conditions for both primer pairs were 95°C for 30 sec, followed by 35 cycles of 94°C for 30 sec, 58°C for 30 sec, and 72°C for 50 sec with signal acquisition. The PCRs were always performed on separate 96-well plates, with the

same samples in the same well positions. All samples were assayed in duplicate using the Mx3005P QPCR System (Agilent, Santa Clara, CA). In each run, negative and positive controls, a calibrator DNA, and a standard curve were included. The  $R^2$  for each standard curve was  $\geq 0.99$ , with acceptable standard deviations set under 0.25 (for the Ct values). Otherwise, the test was repeated. The reproducibility of the assay was assessed by analyzing the intra- and inter-assay coefficient of variation. The mean inter-assay coefficient of variation (CV) was 8.1% (range, 5.2 % to 11.7 %), whereas the mean intra-assay CV was 6.2% (range, 4.4 % to 9.1 %), indicating excellent assay reproducibility. All persons conducting this experimental procedures were blinded to the endpoint of our study.

### Western blotting

Protein extracts (20 $\mu$ g) from Jurkat cells and H9 cells at 24h after transfection with empty vector pcDNA3.1 or Tfam expression vector pTFAM were prepared using lysis buffer (10 mM HEPES, pH 7.9, 10 mM KCl, 2 mM MgCl<sub>2</sub>, 0.5 mM dithiothreitol, 1 mM PMSF, 5  $\mu$ g/mL aprotinin, 5  $\mu$ g/mL pepstatin, 5  $\mu$ g/mL leupeptin, and 1% Triton X-100), then separated by 10% SDS-PAGE, and analyzed by Western blot using rabbit anti-human TFAM polyclonal antibodies (Abcam, ab47517, 1:1000) and an enhanced chemiluminescence system (ECL, Amersham Pharmacia Biotech). Equivalent protein loading was verified by blotting with anti- $\beta$ -actin antibody (Abcam, ab119716, 1:5000).

## REFERENCES

1. Xing J, Chen M, Wood CG, Lin J, Spitz MR, Ma J, Amos CI, Shields PG, Benowitz NL, Gu J, de Andrade M, Swan GE and Wu X. Mitochondrial DNA content: its genetic heritability and association with renal cell carcinoma. *Journal of the National Cancer Institute*. 2008; 100:1104-1112.

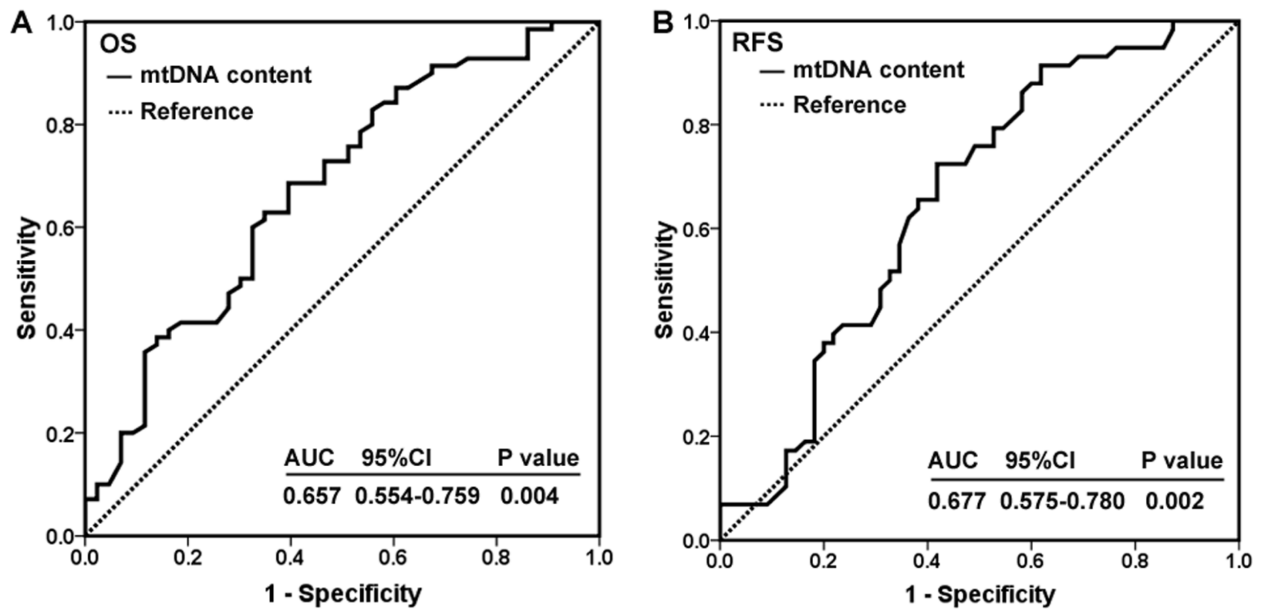

Supplementary Figure 1: Receiver operating characteristic (ROC) curve analysis of mtDNA content cutoff point in training cohort for. A. OS and B. RFS.

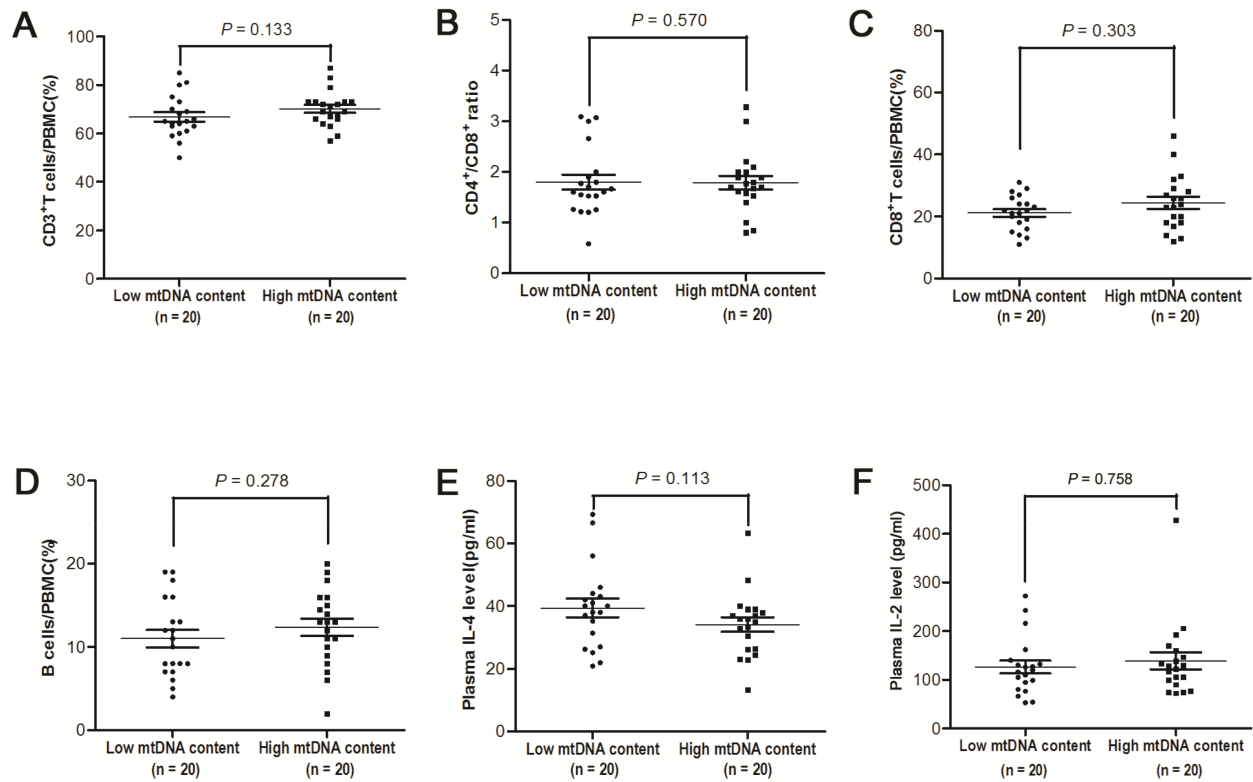

**Supplementary Figure 2: Immunophenotypes of PBMCs and plasma concentration of cytokines in HCC patients with different leukocyte mtDNA content.** A-D. Flow cytometry analyses for percentage of CD3<sup>+</sup> in PBMCs, CD4<sup>+</sup> /CD8<sup>+</sup> T cells ratio, CD8<sup>+</sup> T cells in PBMCs and B cells in PBMCs from HCC patients with high and low mtDNA content (both n = 20). E-F. ELISA analyses for the plasma concentrations of IL-4 and IL-2 from HCC patients with high and low mtDNA content (both n = 20).

Supplementary Table 1: Demographic and clinical characteristics of HCC patient population

| Variables                                 | Total cohort<br>(n = 618) | Training cohort<br>(n = 113) | Validation cohort<br>(n = 505) | P value |
|-------------------------------------------|---------------------------|------------------------------|--------------------------------|---------|
|                                           | Number (%)                | Number (%)                   | Number (%)                     |         |
| <b>Sex</b>                                |                           |                              |                                |         |
| Male                                      | 544 (88.0)                | 103 (91.2)                   | 441 (87.3)                     | 0.258   |
| Female                                    | 74 (12.0)                 | 10 (8.8)                     | 64 (12.7)                      |         |
| <b>HBsAg</b>                              |                           |                              |                                |         |
| Positive                                  | 559 (90.5)                | 99 (87.6)                    | 460 (91.1)                     | 0.255   |
| Negative                                  | 59 (9.5)                  | 14 (12.4)                    | 45 (8.9)                       |         |
| <b>Tumor size(cm)</b>                     |                           |                              |                                |         |
| <6                                        | 322 (52.1)                | 71 (62.8)                    | 251 (49.7)                     | 0.012   |
| ≥6                                        | 296 (47.9)                | 42 (37.2)                    | 254 (50.3)                     |         |
| <b>Number of tumors</b>                   |                           |                              |                                |         |
| Single                                    | 503 (81.4)                | 92 (81.4)                    | 411 (81.4)                     | 0.994   |
| Multiple                                  | 115 (18.6)                | 21 (18.6)                    | 94 (18.6)                      |         |
| <b>PVT</b>                                |                           |                              |                                |         |
| Yes                                       | 66 (10.7)                 | 13 (11.5)                    | 53 (10.5)                      | 0.753   |
| No                                        | 552 (89.3)                | 100 (88.5)                   | 452 (89.5)                     |         |
| <b>TNM stage</b>                          |                           |                              |                                |         |
| I                                         | 424 (68.6)                | 62 (54.9)                    | 362 (71.7)                     | <0.001  |
| II                                        | 64 (10.4)                 | 20 (17.7)                    | 44 (8.7)                       |         |
| III                                       | 115 (18.6)                | 29 (25.7)                    | 86 (17.0)                      |         |
| IV                                        | 15 (2.4)                  | 2 (1.7)                      | 13 (2.6)                       |         |
| <b>Differentiation, n(%)</b>              |                           |                              |                                |         |
| Well                                      | 28 (4.5)                  | 12 (10.6)                    | 16 (3.2)                       | <0.001  |
| Moderate                                  | 185 (29.9)                | 43 (38.1)                    | 142 (28.1)                     |         |
| Poor                                      | 405 (65.6)                | 58 (51.3)                    | 347 (68.7)                     |         |
| <b>Serum AFP(μg/L)</b>                    |                           |                              |                                |         |
| <200                                      | 237 (38.3)                | 33 (29.2)                    | 204 (40.4)                     | 0.027   |
| ≥200                                      | 381 (61.7)                | 80 (70.8)                    | 301 (59.6)                     |         |
| <b>Recurrence</b>                         |                           |                              |                                |         |
| Yes                                       | 373 (60.4)                | 73 (64.6)                    | 300 (59.4)                     | 0.017   |
| No                                        | 245 (39.6)                | 40 (35.4)                    | 205 (40.6)                     |         |
| <b>Death</b>                              |                           |                              |                                |         |
| Yes                                       | 240 (38.8)                | 58 (51.3)                    | 182 (36.0)                     | 0.001   |
| No                                        | 378 (61.2)                | 55 (48.7)                    | 323 (64.0)                     |         |
| <b>Median age by years (range)</b>        | 52 (21 - 79)              | 51 (27 - 77)                 | 52 (21 - 79)                   | 0.093   |
| <b>mtDNA content, Median(range)</b>       | 0.98 (0.12 - 3.70)        | 0.99 (0.16 - 3.39)           | 0.98 (0.12 - 3.70)             | 0.987   |
| <b>Follow-up by months, Median(range)</b> | 33.4 (3.6 - 70.0)         | 44.6 (16.0 - 70.0)           | 32.2 (3.6 - 56.0)              | <0.001  |

Supplementary Table 2: Comparison of mtDNA content between different subgroups of HCC patients in the training, validation and combined cohorts

| Characteristics         | Training cohort (n = 113) |                  | Validation cohort (n = 505) |              | Combined cohort (n = 618) |              |
|-------------------------|---------------------------|------------------|-----------------------------|--------------|---------------------------|--------------|
|                         | mtDNA content (median)    | P value          | mtDNA content (median)      | P value      | mtDNA content (median)    | P value      |
| <b>Age, years</b>       |                           |                  |                             |              |                           |              |
| ≤ 52                    | 1.00 (0.31 - 3.27)        |                  | 0.99 (0.21 - 3.70)          |              | 0.99 (0.21 - 3.70)        |              |
| > 52                    | 0.95 (0.29 - 2.89)        | 0.186            | 0.98 (0.23 - 3.57)          | 0.697        | 0.97 (0.23 - 3.57)        | 0.335        |
| <b>Sex</b>              |                           |                  |                             |              |                           |              |
| Male                    | 0.99 (0.29 - 3.27)        |                  | 0.99 (0.21 - 3.70)          |              | 0.99 (0.21 - 3.70)        |              |
| Female                  | 0.89 (0.31 - 2.20)        | 0.547            | 0.95 (0.22 - 2.79)          | 0.418        | 0.94 (0.22 - 2.79)        | 0.870        |
| <b>HBsAg</b>            |                           |                  |                             |              |                           |              |
| Positive                | 0.99 (0.29 - 3.27)        |                  | 0.99 (0.21 - 3.70)          |              | 0.99 (0.21 - 3.70)        |              |
| Negative                | 0.89 (0.63 - 1.21)        | 0.164            | 0.94 (0.45 - 2.79)          | 0.863        | 0.93 (0.45 - 2.79)        | 0.526        |
| <b>Tumor size(cm)</b>   |                           |                  |                             |              |                           |              |
| <6                      | 0.99 (0.38 - 2.60)        |                  | 0.94 (0.21 - 3.70)          |              | 0.96 (0.21 - 3.70)        |              |
| ≥6                      | 0.92 (0.29 - 3.27)        | 0.452            | 1.00 (0.28 - 3.67)          | 0.121        | 0.99 (0.28 - 3.67)        | 0.266        |
| <b>Number of tumors</b> |                           |                  |                             |              |                           |              |
| Single                  | 0.96 (0.29 - 2.63)        |                  | 0.97 (0.21 - 3.70)          |              | 0.97 (0.21 - 3.70)        |              |
| Multiple                | 1.00 (0.59 - 3.27)        | 0.107            | 1.00 (0.31 - 3.07)          | 0.624        | 1.00 (0.31 - 3.27)        | 0.412        |
| <b>PVT</b>              |                           |                  |                             |              |                           |              |
| Yes                     | 1.01 (0.76 - 3.27)        |                  | 1.05 (0.21 - 2.55)          |              | 1.03 (0.21 - 3.27)        |              |
| No                      | 0.95 (0.29 - 2.89)        | 0.34             | 0.96 (0.22 - 3.70)          | 0.908        | 0.96 (0.22 - 3.70)        | 0.419        |
| <b>TNM stage</b>        |                           |                  |                             |              |                           |              |
| I+II                    | 0.96 (0.55 - 2.89)        |                  | 0.98 (0.22 - 3.70)          |              | 0.98 (0.22 - 3.70)        |              |
| III+IV                  | 1.05 (0.29 - 3.27)        | 0.092            | 1.00 (0.21 - 3.07)          | 0.625        | 1.01 (0.21 - 3.27)        | 0.322        |
| <b>Differentiation</b>  |                           |                  |                             |              |                           |              |
| Well+Moderate           | 0.93 (0.29 - 3.27)        |                  | 0.97 (0.23 - 3.67)          |              | 0.96 (0.23 - 3.67)        |              |
| Poor                    | 1.00 (0.38 - 2.60)        | 0.996            | 0.99 (0.21 - 3.70)          | 0.712        | 0.99 (0.21 - 3.70)        | 0.559        |
| <b>Serum AFP(μg/L)</b>  |                           |                  |                             |              |                           |              |
| <200                    | 0.99 (0.29 - 3.27)        |                  | 0.99 (0.21 - 3.70)          |              | 0.99 (0.21 - 3.70)        |              |
| ≥200                    | 0.94 (0.31 - 2.56)        | 0.412            | 0.96 (0.22 - 2.79)          | 0.679        | 0.96 (0.22 - 2.79)        | 0.661        |
| <b>Recurrence</b>       |                           |                  |                             |              |                           |              |
| Yes                     | 1.05 (0.55 - 3.27)        |                  | 1.04 (0.21 - 3.57)          |              | 1.04 (0.21 - 3.57)        |              |
| No                      | 0.87 (0.29 - 2.20)        | <b>&lt;0.001</b> | 0.88 (0.22 - 3.70)          | <b>0.003</b> | 0.87 (0.22 - 3.70)        | <b>0.002</b> |
| <b>Death</b>            |                           |                  |                             |              |                           |              |
| Yes                     | 1.05 (0.59 - 3.27)        |                  | 1.07 (0.21 - 3.57)          |              | 1.07 (0.21 - 3.57)        |              |
| No                      | 0.80 (0.29 - 2.56)        | <b>&lt;0.001</b> | 0.90 (0.22 - 3.70)          | <b>0.001</b> | 0.88 (0.22 - 3.70)        | 0.001        |

Notes: Data were presented as Median (Range), unless otherwise stated. TNM, tumor-node-metastasis; mtDNA content, mitochondrial DNA content. The P values were calculated using an unpaired student's t test.

**Supplementary Table 3: Univariate Cox regression analysis of overall survival and recurrence-free survival for HCC patients**

| Variables                                | Training cohort     |         | Validation cohort  |         | Pooled analysis    |         |
|------------------------------------------|---------------------|---------|--------------------|---------|--------------------|---------|
|                                          | HR (95% CI)         | P value | HR (95% CI)        | P value | HR (95% CI)        | P value |
| <b>Overall survival</b>                  |                     |         |                    |         |                    |         |
| Age (>52 vs. ≤52)                        | 1.12 (0.81 - 1.69)  | 0.662   | 1.19 (0.87 - 1.64) | 0.283   | 1.11 (0.85 - 1.44) | 0.441   |
| Sex (male vs. female)                    | 2.06 (0.75 - 5.65)  | 0.159   | 1.35 (0.81 - 2.23) | 0.247   | 1.48 (0.94 - 2.31) | 0.089   |
| HBsAg (positive vs. negative)            | 1.49 (0.95 - 3.48)  | 0.086   | 1.32 (0.70 - 2.51) | 0.657   | 1.14 (0.74 - 1.75) | 0.568   |
| Tumor size (≥6cm vs. <6cm)               | 2.90 (1.83 - 4.60)  | <0.001  | 2.29 (1.63 - 3.22) | <0.001  | 2.40 (1.84 - 3.15) | <0.001  |
| Number of tumors (multiple vs. single)   | 1.90 (1.16 - 3.10)  | 0.011   | 2.11 (1.47 - 3.04) | <0.001  | 2.04 (1.52 - 2.73) | <0.001  |
| PVT (yes vs. no)                         | 5.87 (3.24 - 10.64) | <0.001  | 4.41 (2.99 - 6.49) | <0.001  | 4.74 (3.43 - 6.55) | <0.001  |
| TNM stage ( III+IV vs. I+II)             | 4.18 (2.62 - 6.66)  | <0.001  | 3.32 (2.36 - 4.66) | <0.001  | 3.55 (2.70 - 4.67) | <0.001  |
| Differentiation (Poor vs. Moderate+Well) | 2.96 (1.80 - 4.84)  | <0.001  | 2.30 (1.52 - 3.48) | <0.001  | 2.46 (1.79 - 3.37) | <0.001  |
| Serum AFP (≥200μg/L vs. <200μg/L)        | 2.05 (1.27 - 3.29)  | 0.003   | 2.26 (1.63 - 3.12) | <0.001  | 2.14 (1.65 - 2.79) | <0.001  |
| mtDNA content (high vs. low)             | 1.99 (1.27 - 3.54)  | 0.001   | 1.41 (1.02 - 1.93) | 0.042   | 1.53 (1.17 - 2.00) | 0.002   |
| <b>Recurrence-free survival</b>          |                     |         |                    |         |                    |         |
| Age (>52 vs. ≤52)                        | 1.06 (0.62 - 1.71)  | 0.722   | 1.09 (0.72 - 1.37) | 0.836   | 1.08 (0.71 - 1.34) | 0.808   |
| Sex (male vs. female)                    | 1.09 (0.41 - 2.03)  | 0.911   | 1.17 (0.79 - 1.64) | 0.523   | 1.13 (0.73 - 1.88) | 0.381   |
| HBsAg (positive vs. negative)            | 1.43 (0.77 - 2.36)  | 0.202   | 1.28 (0.84 - 1.57) | 0.917   | 1.38 (0.79 - 1.96) | 0.544   |
| Tumor size (≥6cm vs. <6cm)               | 1.94 (1.19 - 3.28)  | 0.008   | 1.85 (1.43 - 2.89) | <0.001  | 1.91 (1.55 - 2.94) | <0.001  |
| Number of tumors (multiple vs. single)   | 2.23 (1.16 - 4.09)  | 0.011   | 1.61 (1.12 - 2.34) | 0.013   | 1.83 (1.20 - 2.58) | 0.004   |
| PVT (yes vs. no)                         | 2.44 (1.18 - 4.06)  | 0.009   | 1.91 (1.13 - 2.88) | 0.012   | 2.07 (1.19 - 3.24) | 0.008   |
| TNM stage ( III+IV vs. I+II)             | 4.48 (2.51 - 8.82)  | <0.001  | 2.66 (1.63 - 5.72) | <0.001  | 2.92 (1.83 - 5.33) | <0.001  |
| Differentiation (Poor vs. Moderate+Well) | 2.58 (1.51 - 4.43)  | <0.001  | 2.07 (1.28 - 4.18) | <0.001  | 2.16 (1.35 - 3.96) | <0.001  |
| Serum AFP (≥200μg/L vs. <200μg/L)        | 1.99 (1.16 - 3.55)  | 0.009   | 1.86 (1.33 - 3.11) | <0.001  | 1.91 (1.22 - 2.93) | <0.001  |
| mtDNA content (high vs. low)             | 1.98 (1.15 - 3.54)  | 0.01    | 1.93 (1.38 - 2.82) | <0.001  | 1.94 (1.26 - 2.98) | <0.001  |

Notes: mtDNA, mitochondrial DNA; HR, hazard ratio; 95% CI, 95% confidence interval.

**Supplementary Table 4: Joint effects of mtDNA content and TNM stage on HCC patients' overall and recurrence-free survival**

| Variables                         | Overall survival   |                        | Recurrence-free survival |                        |
|-----------------------------------|--------------------|------------------------|--------------------------|------------------------|
|                                   | HR (95%CI)         | <i>P</i> value         | HR (95%CI)               | <i>P</i> value         |
| Low mtDNA content + Stage I/II    | 1 (reference)      |                        | 1 (reference)            |                        |
| Low mtDNA content + Stage III/IV  | 3.74 (2.40 - 5.81) | 4.72×10 <sup>-9</sup>  | 3.03 (2.14 - 4.29)       | 4.07×10 <sup>-10</sup> |
| High mtDNA content + Stage I/II   | 2.03 (1.46 - 2.84) | 3.12×10 <sup>-5</sup>  | 1.71 (1.33 - 2.19)       | 2.59×10 <sup>-5</sup>  |
| High mtDNA content + Stage III/IV | 6.12 (4.17 - 8.98) | 2.23×10 <sup>-20</sup> | 4.29 (3.12 - 5.88)       | 2.09×10 <sup>-19</sup> |
| <i>P</i> for trend                |                    | 2.43×10 <sup>-20</sup> |                          | 4.87×10 <sup>-20</sup> |

Notes: mtDNA, mitochondrial DNA; HR: hazard ratio; 95% CI, 95% confidence interval. We calculated hazard ratios and *P* values with an adjusted multivariate Cox proportional hazards regression model, including age, sex, HBsAg, TNM stage, differentiation, serum AFP and mtDNA content as covariates.

Supplementary Table 5: Comparison of mtDNA content between different subgroups of 40 additional HCC patients

| Characteristics         | mtDNA content, median (range) | <i>P</i> value |
|-------------------------|-------------------------------|----------------|
| <b>Age (years)</b>      |                               |                |
| ≤52                     | 0.99 (0.21-3.70)              | 0.454          |
| >52                     | 0.97 (0.23-3.57)              |                |
| <b>Sex</b>              |                               |                |
| Male                    | 0.99 (0.21-3.70)              | 0.542          |
| Female                  | 0.94 (0.22-2.79)              |                |
| <b>HBsAg</b>            |                               |                |
| Positive                | 0.99 (0.21-3.70)              | 0.638          |
| Negative                | 0.94 (0.45-2.79)              |                |
| <b>Tumor size(cm)</b>   |                               |                |
| <6                      | 0.96 (0.21-3.70)              | 0.035          |
| ≥6                      | 1.01 (0.28-3.67)              |                |
| <b>Number of tumors</b> |                               |                |
| Single                  | 0.97 (0.21-3.70)              | 0.163          |
| Multiple                | 1.00 (0.31-3.27)              |                |
| <b>PVT</b>              |                               |                |
| Yes                     | 1.05 (0.21-3.27)              | 0.109          |
| No                      | 0.96 (0.22-3.70)              |                |
| <b>TNM stage</b>        |                               |                |
| I+II                    | 0.97 (0.22-3.70)              | 0.258          |
| III+IV                  | 1.02 (0.21-3.27)              |                |
| <b>Differentiation</b>  |                               |                |
| Well+Moderate           | 1.01 (0.21-3.70)              | 0.109          |
| Poor                    | 0.98 (0.22-3.67)              |                |
| <b>Serum AFP(μg/L)</b>  |                               |                |
| <200                    | 0.99 (0.21-3.70)              | 0.095          |
| ≥200                    | 0.94 (0.22-3.27)              |                |

TNM, tumor-node-metastasis; mtDNA content, mitochondrial DNA content. The *P* values were calculated using Mann-Whitney U test.
